# Supplementary material for: A small targeting domain in Ty1 integrase is sufficient to direct retrotransposon integration upstream of tRNA genes
Source: PubMed Central journal article supplement — EMBO J. 2020 Jul 17;39(17):e104337. doi: 10.15252/embj.2019104337 (PMC7459421; doi:10.15252/embj.2019104337), 2020-07-17
Supplement: EMBJ-39-e104337-s001.pdf [file EMBJ-39-e104337-s001.pdf]

## Expanded View Figures

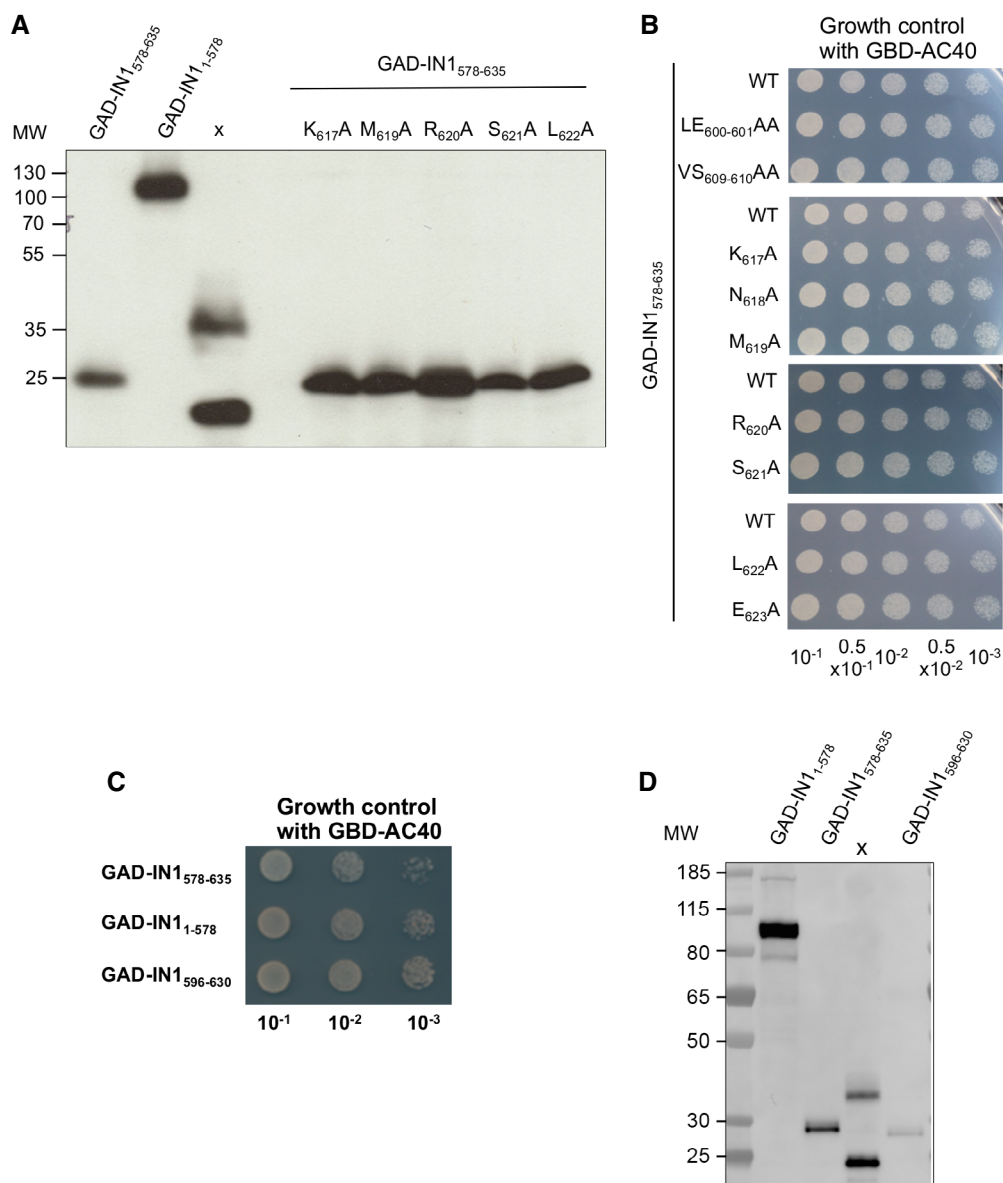

**Figure EV1. Mutations in the IN1 bNLS linker sequence abolish the interaction with AC40.**

- A Validation of the expression of GAD-IN1 fusion proteins for the two-hybrid assay shown in Fig 1B. Whole-cell extract samples were prepared for immunoblotting from 1 DO<sub>600</sub> of the cell culture by TCA precipitation. GAD-IN1 fusion proteins were detected by Western blot with anti-HA antibody (12CA5, Roche). All constructs harbor an HA-tag that is present between the GAD and IN1 sequences in the original pACTII vector. Expected sizes of the proteins are 26 kDa for GAD-IN1<sub>578-635</sub> and GAD-IN1<sub>1-578</sub> mutants and 82 kDa for GAD-IN1<sub>1-578</sub>. "x", non-relevant sample.
- B Growth control of cell cultures corresponding to the two-hybrid assay shown in Fig 1B. Twofold serial dilutions of cell cultures, starting from 10<sup>-1</sup>, were plated on DO-Leu-Trp plates to check for growth.
- C Growth control of cell cultures corresponding to the two-hybrid assay shown in Fig 1C. Twofold serial dilutions of cell cultures, starting from 10<sup>-1</sup>, were plated on DO-Leu-Trp plates to check for growth.
- D Validation of the expression of GAD-IN1 fusion proteins for the two-hybrid assay shown in Fig 1C. Whole-cell extract samples were prepared for immunoblotting from 1 DO<sub>600</sub> of the cell culture by TCA precipitation. GAD-IN1 proteins were detected by Western blot with anti-GAD antibody (Santa Cruz Biotechnology). Expected sizes of the proteins are 82 kDa for GAD-IN1<sub>1-578</sub>, 26 kDa for GAD-IN1<sub>578-635</sub>, and 24 kDa for GAD-IN1<sub>596-630</sub>. "x", non-relevant sample.

Source data are available online for this figure.

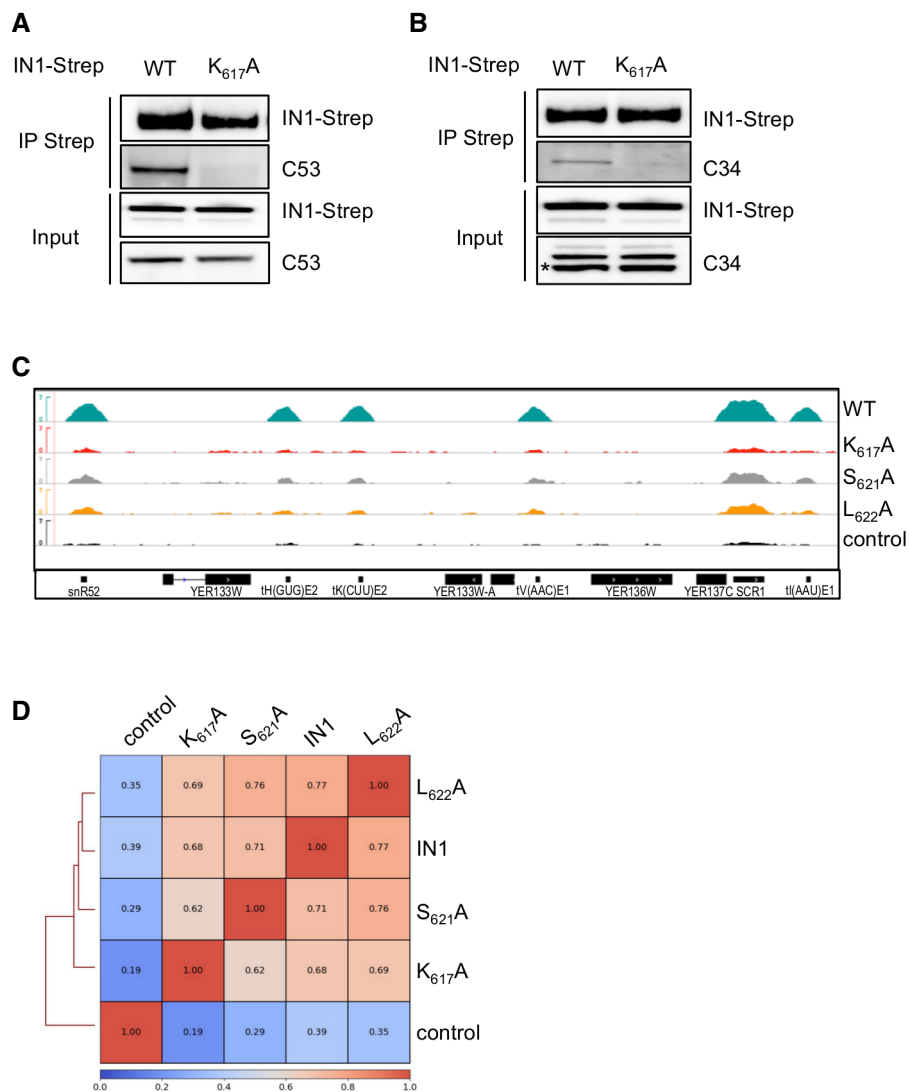

**Figure EV2. AC40 recruits IN1 at Pol I- and Pol III-transcribed genes.**

A, B Co-immunoprecipitation of endogenous Pol III subunits (C53 and C34) using ectopically expressed Ty1 integrase (IN1-Strep) as bait. Panels A and B were two separate lysates from two separate co-IPs. Expected sizes are 53 kDa for C53, 34 kDa for C34 and 82 kDa for IN1-Strep (WT and K<sub>617</sub>A mutant). \*, C34.

C Genome browser visualization of different IN1-HA occupancy for chromosome V (coordinates chrV:431129..443275). Control is an anti-HA immunoprecipitation of chromatin extracts in cells expressing IN1-Strep. The region contains *tH(GUG)E2*, *tK(CUU)E2*, *tV(AAC)E1*, *tI(AAU)E1*, *SNR52*, and *SCR1*, all transcribed by Pol III.

D Pearson correlation heatmap at *tDNAs* between the following CHIP-seq: IN1 WT, K<sub>617</sub>A, S<sub>621</sub>A, L<sub>622</sub>A and control.

Source data are available online for this figure.

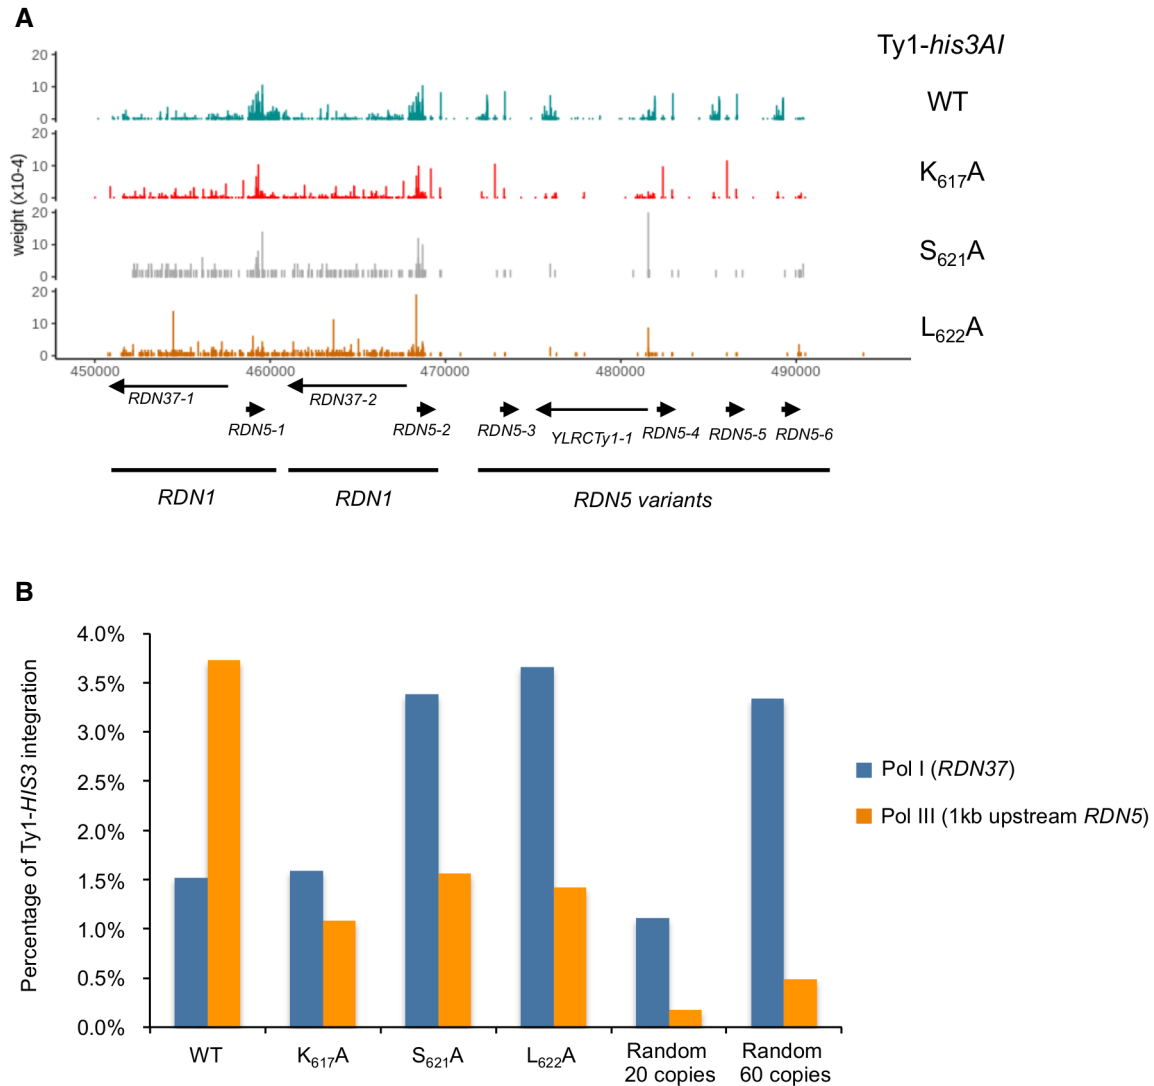

**Figure EV3. Ty1 integration profile at the *RDN1* repeats.**

A Visualization of WT and IN1 mutant Ty1-*HIS3* insertions into the *RDN1* repeats and adjacent *RDN5* variants.

B Quantification of Ty1-*HIS3* insertions events (WT and mutants) at *RDN37* (Pol I-transcribed gene) and in a 1 kb window upstream of *RDN5* (Pol III-transcribed gene). Control cases are  $1 \times 10^5$  Ty1 random insertions in artificial yeast genomes composed of 20 or 60 *RDN1* repeats. Of note, less *de novo* Ty1 insertion events were recovered for the S<sub>621</sub>A and L<sub>622</sub>A mutants than for WT and K<sub>617</sub>A mutants.

**Figure EV4. IN1 targeting domain directs Ty5 integration at Pol III-transcribed genes.**

A–D (A and C) Growth control of cell cultures corresponding to the two-hybrid assay shown in Fig 5A. Ten-fold serial dilutions of cell cultures, starting from  $10^{-1}$ , were plated on DO-Leu-Trp plates to check for growth (B and D). Validation of the expression of GAD-IN1 and GAD-IN5 fusion proteins for the two-hybrid assay shown in Fig 5A. Whole-cell extract samples were prepared for immunoblotting as for Fig EV1A. Expected sizes of the proteins are 25 kDa for GAD-IN1<sub>578–635</sub> mutants and 82 kDa for GAD-IN1<sub>1–578</sub>, around 100 kDa for GAD-IN5 constructions.

E Genome browser visualization of HA-IN1 or HA-IN5 occupancy at the *RDN1* locus encoding ribosomal RNA genes. Control is an anti-HA immunoprecipitation of chromatin extracts in cells expressing IN1-Strep. Values obtained from ChIP-seq analysis have been normalized for each condition (WT and mutant IN5) to input and adjusted in log<sub>2</sub> RPKM.

F Pearson correlation heatmap at *tDNAs* between the following ChIP-seq: IN1, IN5, IN5<sub>ΔTD5</sub>, IN5<sub>ΔTD5+bNLS</sub>, and control.

G Retrotransposition frequency, shown on a log scale of p*GAL1*-Ty5*his3AI* and p*GAL1*-Ty5*his3AI* (IN5<sub>ΔTD5+bNLS</sub>) in an *spt3-101* (LV47) or *rad52Δ* strain (LV172). Values are mean  $\pm$  SD,  $n = 2$  experiments, each performed with four independent colonies.

Source data are available online for this figure.

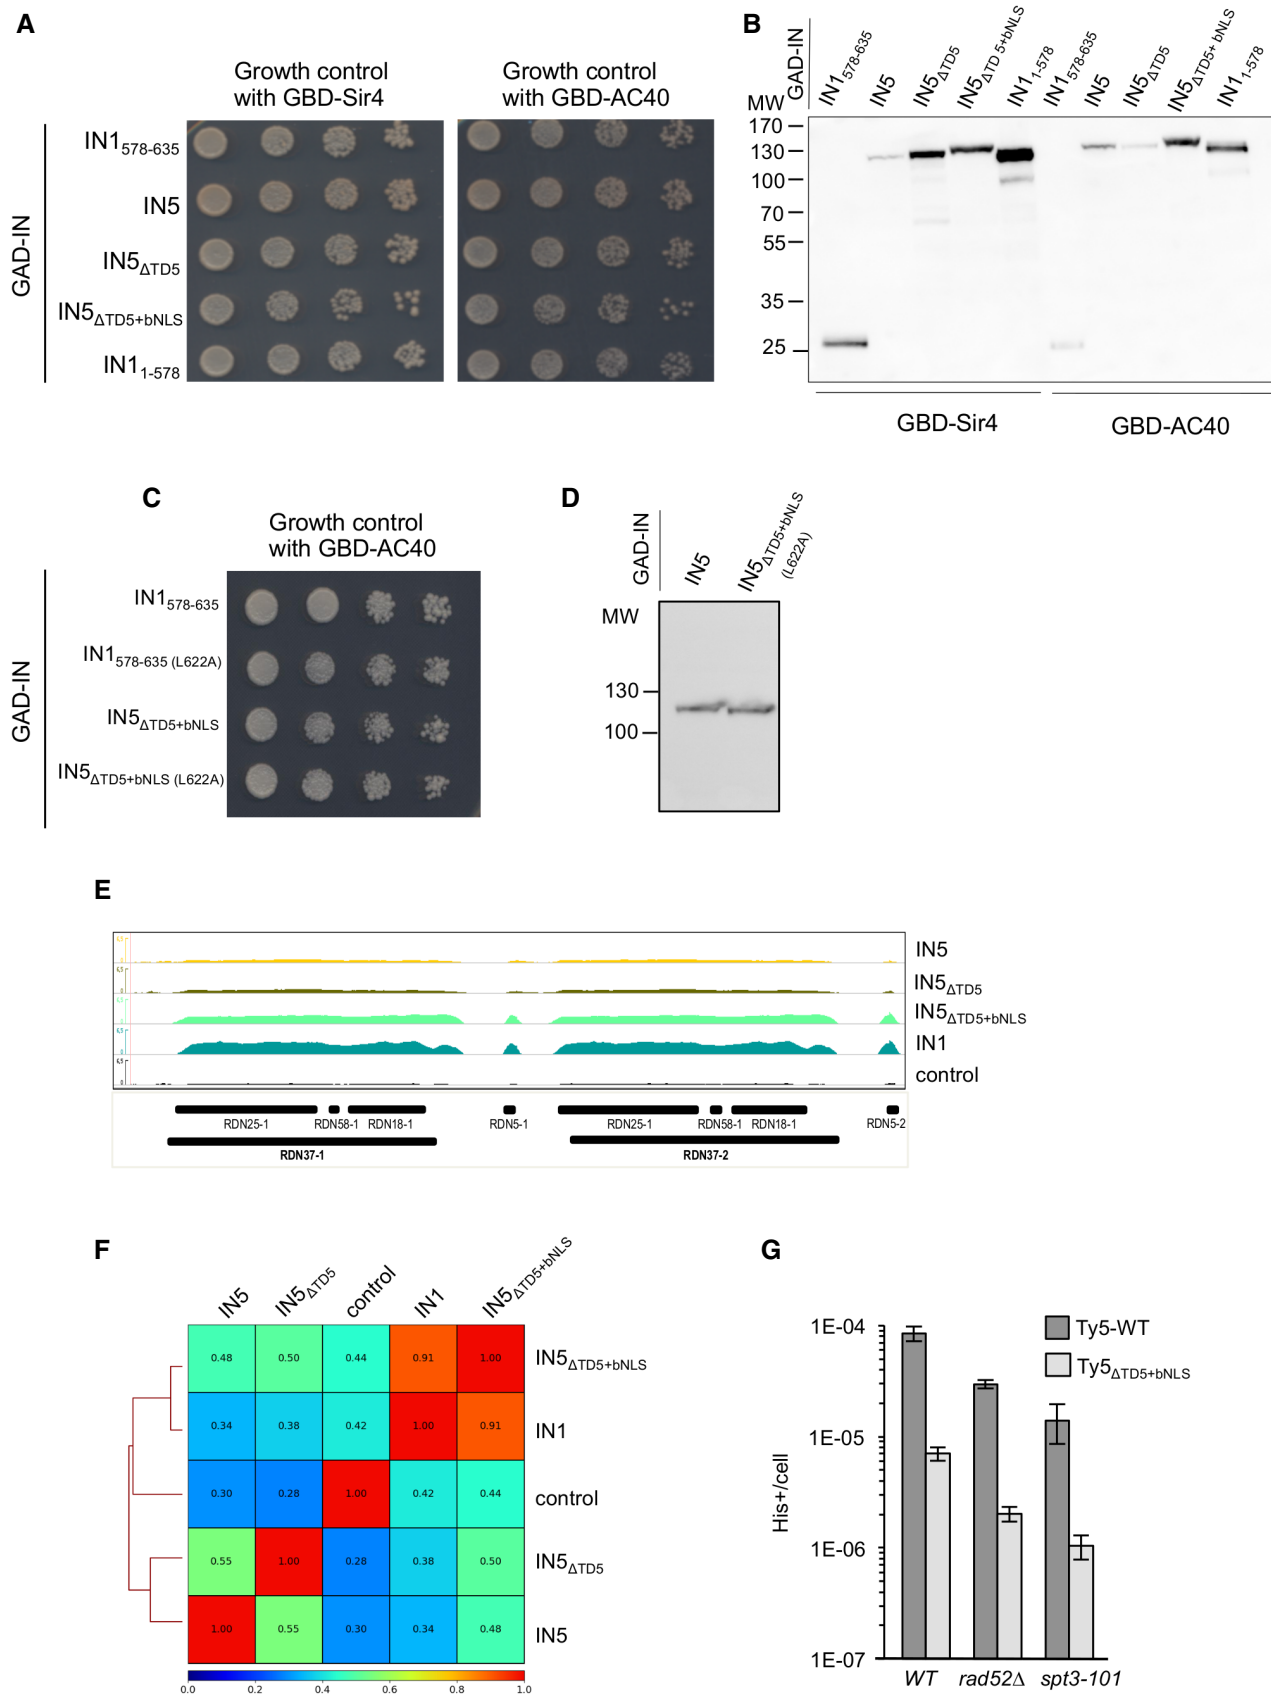

Figure EV4.
